# Supplementary material for: Metal–organic frameworks loaded Au nanozymes with enhanced peroxidase-like activity for multi-targeted biodetection
Source: Royal Society of Chemistry journal article supplement (doi:10.1039/d2ma00844k), 2022-01-01
Supplement: d2ma00844k1.pdf [file d2ma00844k1.pdf]

*Supporting information for:*

## Metal-organic Frameworks Loaded Au Nanozyme with Enhanced Peroxidase-like Activity for Multi-targeted Biodetection

*Quan Liu, Hanhan Wang<sup>a,b</sup>, Qi Yang<sup>a\*</sup>, Yuping Tong<sup>b\*</sup>, Weiwei He<sup>a</sup>*

<sup>a</sup>Key Laboratory of Micro-Nano Materials for Energy Storage and Conversion of Henan Province, Institute of Surface Micro and Nano Materials, College of Chemical and Materials Engineering, Xuchang University, Xuchang, Henan 461000, P. R. China

<sup>b</sup>School of Materials, North China University of Water Resources and Electric Power, Zhengzhou, Henan 450045, China

### **\*To whom Correspondence should be addressed**

E-mail: yangq@xcu.edu.cn (Q.Y.), yptong\_zz@163.com (Y. T.)

### **Notes**

The authors declare no competing financial interest.

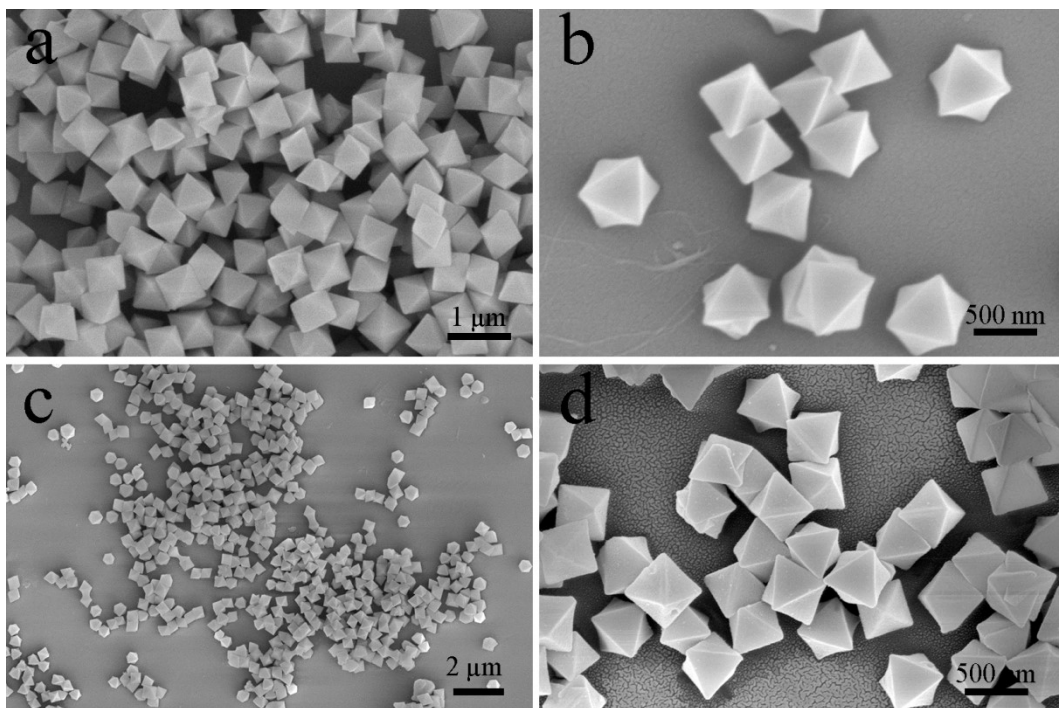

**Figure S1** SEM images of UiO-66 (a, b) and Au/UiO-66 nanocomposites (c, d).

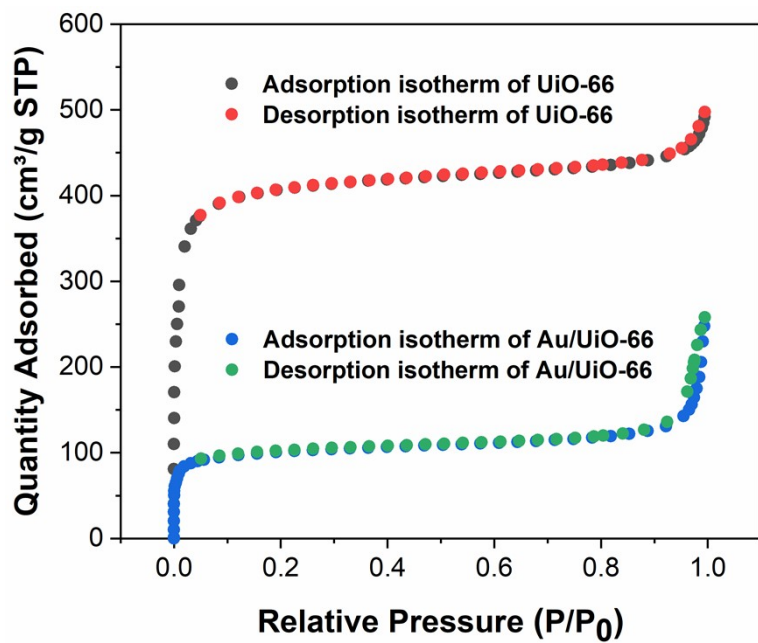

**Figure S2** N<sub>2</sub> adsorption-desorption isotherm of UiO-66 (a) and Au/UiO-66 (b)

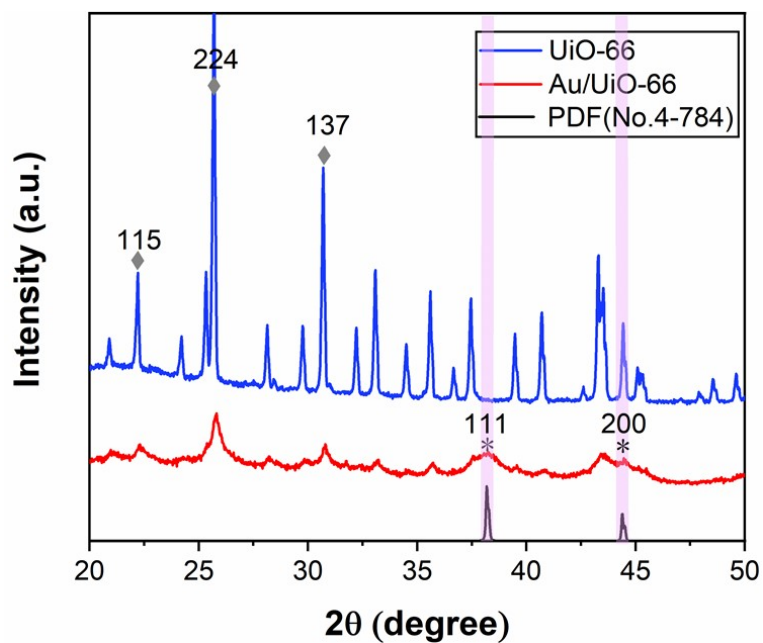

**Figure S3** XRD patterns of pure UiO-66 and Au/UiO-66 nanocomposites.

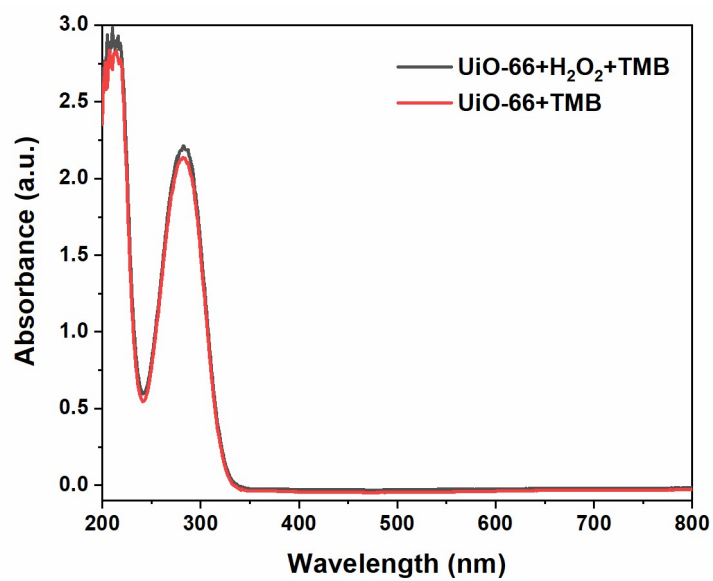

**Figure S4** UV-Vis absorption spectra of UiO-66/TMB in the presence and absence of  $H_2O_2$  could not oxidized TMB.

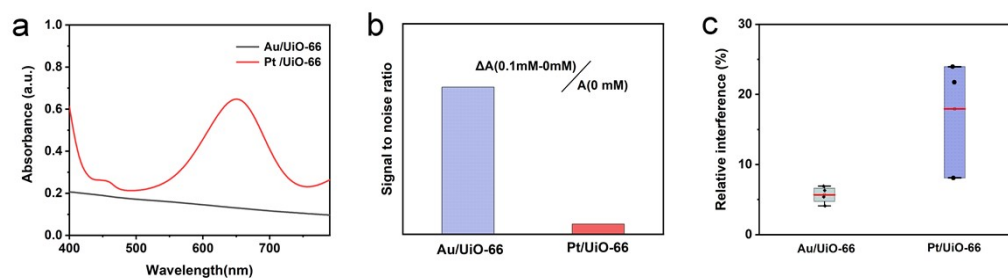

**Figure S5** (a) Comparison of oxidase-like background signal interference between Au/UiO-66 and Pt/UiO-66 (no H<sub>2</sub>O<sub>2</sub>). (b) Signal noise ratio (SNR) of Au/UiO-66 and Pt/UiO-66 at their added amount of 0.1 mM. (c) Relative interference of other substances in Au/UiO-66 and Pt/UiO-66 glucose detection.

Table. S1 Comparison of kinetic parameters among the nanozymes.

| Nanozymes            | Substrate                     | K <sub>m</sub> (mM) | V <sub>max</sub> (10 <sup>-8</sup> M <sup>-1</sup> ) | Ref       |
|----------------------|-------------------------------|---------------------|------------------------------------------------------|-----------|
| HRP                  | TMB                           | 0.434               | 10                                                   | 1         |
|                      | H <sub>2</sub> O <sub>2</sub> | 37                  | 8.71                                                 |           |
| Au-Ft                | TMB                           | 0.097               | 7.46                                                 | 2         |
|                      | H <sub>2</sub> O <sub>2</sub> | 199.4               | 9.34                                                 |           |
| Au NPs               | TMB                           | 0.0112              | 8.3                                                  | 3         |
|                      | H <sub>2</sub> O <sub>2</sub> | 33                  | 6.1                                                  |           |
| Cu <sub>2</sub> O-Au | H <sub>2</sub> O <sub>2</sub> | 0.54                | 1.94                                                 | 4         |
|                      | TMB                           | 0.036               | 6.1                                                  |           |
| Au/UiO-66            | TMB                           | 0.036               | 6.1                                                  | This work |
|                      | H <sub>2</sub> O <sub>2</sub> | 0.58                | 4.82                                                 |           |

## References

1. L. Gao, J. Zhuang, L. Nie, J. Zhang, Y. Zhang, N. Gu, T. Wang, J. Feng, D. Yang, S. Perrett and X. Yan, *Nature Nanotechnology*, 2007, **2**, 577-583.
2. C. S. Xin Jiang , Yi Guo, Guangjun Nie , L i X u *Biosensors and Bioelectronics*, 2015, **64**, 165-170.
3. Y. Liu, C. Wang, N. Cai, S. Long and F. Yu, *Journal of Materials Science*, 2014, **49**, 7143-7150.
4. D. Dai, H. Liu, H. Ma, Z. Huang, C. Gu and M. Zhang, *Journal of Alloys and Compounds*, 2018, **747**, 676-683.
